RESEARCH ARTICLE

# Therapeutic Effects of Tangshen Formula on Diabetic Nephropathy in Rats

TingTing Zhao<sup>1</sup>, SiFan Sun<sup>1</sup>, HaoJun Zhang<sup>1</sup>, XiaoRu Huang<sup>2</sup>, MeiHua Yan<sup>1</sup>, Xi Dong<sup>1</sup>, YuMin Wen<sup>1</sup>, Hua Wang<sup>1</sup>, Hui Yao Lan<sup>2\*</sup>, Ping Li<sup>1\*</sup>

**1** Beijing Key Lab for Immune-Mediated Inflammatory Diseases, Institute of Clinical Medical Sciences, China-Japan Friendship Hospital, Beijing, China, **2** Department of Medicine and Therapeutics, and Li Ka Shing Institute of Health Sciences, The Chinese University of Hong Kong, Hong Kong SAR, and Shenzhen Research Institute, The Chinese University of Hong Kong, Shenzhen, China

\* [lp8675@163.com](mailto:lp8675@163.com) (PL); [hylan@cuhk.edu.hk](mailto:hylan@cuhk.edu.hk) (HL)

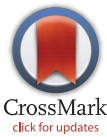

**OPEN ACCESS**

**Citation:** Zhao T, Sun S, Zhang H, Huang X, Yan M, Dong X, et al. (2016) Therapeutic Effects of Tangshen Formula on Diabetic Nephropathy in Rats. PLoS ONE 11(1): e0147693. doi:10.1371/journal.pone.0147693

**Editor:** Zhanjun Jia, University of Utah School of Medicine, UNITED STATES

**Received:** September 9, 2015

**Accepted:** January 7, 2016

**Published:** January 25, 2016

**Copyright:** © 2016 Zhao et al. This is an open access article distributed under the terms of the [Creative Commons Attribution License](https://creativecommons.org/licenses/by/4.0/), which permits unrestricted use, distribution, and reproduction in any medium, provided the original author and source are credited.

**Data Availability Statement:** All relevant data are within the paper and its Supporting Information files.

**Funding:** This work was supported by grants from the National Natural Science Foundation of China (No: 81173422 and 81130066 to PL, No: 81473526 to TTZ, No: 81373795 to HJZ, No: 81302942 to MHY), <http://www.nsf.gov.cn/>; Beijing Natural Science Foundation (No: 7142143 to TTZ), <http://www.bjnsf.org/>; the China-International S & T Cooperation (No: 2011DFA31860 to PL), the Major State Basic Research Development Program of China (973 program, 2012CB517705 to HYL), <http://www.most.gov.cn/>; the Research Grant Council of Hong Kong

## Abstract

### Objective

Inflammation and fibrosis are essential promoters in the pathogenesis of diabetic nephropathy (DN) in type 2 diabetes. The present study examined the anti-inflammation and anti-fibrosis effect of Tangshen Formula (TSF), a traditional Chinese medicine, on DN.

### Research Design and Methods

Protective role of TSF in DN was examined in a rat model of type 2 DN that was established by high-fat diet-fed and low-dose-streptozotocin injection. TSF was suspended in 0.5% CMC-Na solution and delivered by oral gavage at a dosage of 1.67g/Kg body weight/day. The therapeutic effects and mechanisms of TSF on diabetic kidney injury were examined.

### Results

We found that TSF treatment for 20 weeks attenuated DN by significantly inhibiting urinary excretion of albumin and renal histological injuries. These beneficial effects were associated with an inactivation of NF-κB signaling, thereby blocking the upregulation of pro-inflammatory cytokines (IL-1β, TNFα), chemokine (MCP-1), and macrophage infiltration in the TSF-treated rats with type 2 DN. In addition, TSF treatment also inactivated TGF-β/Smad3 signaling and therefore suppressed renal fibrosis including expressions of fibronectin, collagen I, and collagen IV. Further studies revealed that the inhibitory effect of TSF on TGF-β/Smad3 and NF-κB signaling in DN was associated with inhibition of Smurf2-dependent ubiquitin degradation of Smad7.

### Conclusions

The present study reveals that TSF has therapeutic potential for type 2 DN in rats. Blockade of NF-κB-driven renal inflammation and TGF-β/Smad3-mediated renal fibrosis by preventing the Smurf2-mediated Smad7 degradation pathway may be mechanisms through which TSF inhibits type 2 DN.

(CUHK3/CRF/12R to HYL), <http://www.most.gov.cn/>; The Focused Investment Scheme A from Chinese University of Hong Kong (HYL), <http://www.cuhk.edu.hk/chinese/index.html>, and the China–Japan Friendship Hospital Youth Science and Technology Excellence Project. Award Number: 2015-QNYC-B-09. Recipient: Ting Ting Zhao, Ph.D.

**Competing Interests:** The authors have declared that no competing interests exist.

## Introduction

Diabetic nephropathy (DN) is one of the major microvascular complications of diabetes. It is characterized by glomerular hypertrophy, excessive deposition of extracellular matrix in the mesangium and tubulointerstitium with a slow progression to renal fibrosis accompanied by the development of microalbuminuria and a decline of glomerular filtration rate (GFR) [1, 2]. Emerging studies consistently indicate that inflammation is an important mechanism that leads to the development and progression of DN [3]. Macrophages and many inflammatory mediators including TNF $\alpha$ , MCP-1, ICAM-1, IL-1, IL-6, and IL-18 have been shown to be significantly increased in the diabetic kidney in patients with type 2 DN and correlated strongly with the progression of DN as indicated by proteinuria, interstitial fibrosis, and GFR decline [4, 5].

TGF- $\beta$ /Smad signaling has been recognized as one of the key pathways in the development of inflammation and fibrosis in many kidney diseases including DN [6, 7]. It is well established that TGF-1 binds to its receptors, and then activates its downstream signaling molecules, Smad2 and Smad3, to mediate fibrosis [8, 9]. Overexpression of TGF- $\beta$ 1 promotes extracellular matrix production and at the same time inhibits its degradation, resulting in progressive renal fibrosis [10]. Activation of TGF- $\beta$ /Smad3 signaling also causes a degradation of Smad7, an inhibitory Smad that negatively regulates TGF- signaling *via* the ubiquitin-proteasome degradation mechanism [8, 9, 11]. In addition, Smad7 can negatively regulate NF- $\kappa$ B signaling *via* induction of I $\kappa$ B $\alpha$ , an inhibitor of NF- $\kappa$ B, thereby blocking I $\kappa$ B $\alpha$  from degradation and preventing the activation of inflammation driven by NF- $\kappa$ B signaling *in vivo* and *in vitro* [12, 13].

Although a significant progress has been made in our understanding of the pathogenesis of DN, treatment for DN remains ineffective. Therefore, it is an urgent need for searching and developing strategies that can prevent and effectively attenuate the DN progression. In China, traditional Chinese medicine (TCM) is widely used for the treatment of diabetes and its complications, and has become a promising source of new therapeutic agents for DN [14–16]. Tangshen Formula (TSF) is formulated based on the individual property of TCM for the treatment of diabetic kidney disease. We have reported that treatment with TSF significantly improved estimated GFR (eGFR) in patients with diabetes mellitus who have either microalbuminuria or macroalbuminuria [17], but the underlying mechanisms of TSF on DN remain largely unexplored. In the present study, we investigated the anti-inflammatory and anti-fibrotic effects of TSF on DN in a type 2 diabetic nephropathy in rats.

## Materials and Methods

### Herbal formulation and components

TSF was extracted from seven natural herbs: astragalus root (*Astragalus membranaceus* (Fisch.) Bge.), burning bush twig (*Euonymus alatus* (Thunb.) Sieb.), rehmannia root (*Rehmanniaglutinosa* Libosch.), bitter orange (*Citrus aurantium* L.), cornus fruit (*Cornus officinalis* Sieb. et Zuce), rhubarb root and rhizome (*Rheum palmatum* L.), notoginseng root (*Panaxnotoginseng* (Burk.) F.H. Chen) in the ratio of 10:5:4:3.4:3:2:1 (W/W), respectively on a dry-weight products. The TSF powder was prepared and standardized by an established company (Jiangyin Tianjiang Pharmaceutical, Jiangsu, China, <http://www.tianjiang.com>) which is well recognized in China as the high quality control standards.

Quality control for the raw materials of herbs and the final powder was performed according to established guidelines in the *Pharmacopoeia of The People's Republic of China 2010* [18]. Chemical composition of TSF was measured using high-performance liquid chromatography/mass spectrometry (HPLC/MS). Nine most representative compounds were identified in TSF, including: sweroside from *Cornus officinalis* Sieb. et Zuce, rhapontigenin from *Rheum*

*palmatum* L., isomucronulatol-7, 2'-di-glucoside from *Astragalus membranaceus* (Fisch.) Bge., naringin from *Citrus Aurantium* L., isonaringin from *Citrus Aurantium* L., melittoside from *Rehmannia glutinosa* Libosch, ginsenoside Rg1 from *Panax Notoginseng* (Burk) F.H. Chen, morroniside from *Cornus officinalis* Sieb. et Zuce, ginsenoside Rb1 from *Panax Notoginseng* (Burk) F.H. Chen.

## Animals and experimental design

Thirty-five male Wistar rats (8-weeks old, 200–250 grams) were purchased from Beijing HFK Bio-Technology (Beijing, China, Certificate No. SCXK 2002–0010) and randomly divided into normal control group (n = 13) and diabetic group (n = 22). The diabetic rat model was induced according to an established protocol [19]. Briefly, to induce type 2 diabetes, rats were fed with a high-fat diet (38% fat, 12% protein, and 50% carbohydrate) for 5 weeks, whereas, normal control animals received a standard rat chow. After 5 weeks, 4 rats in each group were randomly chosen to receive hyperinsulinemic-euglycemic clamping [20]. All rats in the diabetic group then received a single intraperitoneal injection of a low-dose streptozotocin (STZ, 25 mg/kg, Sigma-Aldrich, St. Louis, MO, USA), while normal control animals received an equivalent dose of citrate buffer solution (pH 4.4). Development of hyperglycemia was confirmed by measuring fasting blood glucose at 72 hours after injection. Rats with fasting blood glucose level above 11.1 μmol/L (One Touch Ultraglucose meter, Life Scan, Milpitas, CA USA) were then randomly divided into 2 subgroups: vehicle-treated or TSF-treated animals (n = 9 each). TSF treatment was initiated on the third day after STZ injection and continued for 20 weeks. TSF was suspended in 0.5% CMC-Na solution and delivered by oral gavage at a dosage of 1.67 g/Kg body weight/day. Rats in normal group received the same volume of 0.5% CMC-Na solution without TSF.

All animals were housed at a temperature of 20–25°C, humidity of 65–69%, and were subjected to a 12-hour light/dark cycle with free access to food and tap water. Rats were kept in individual metabolic cages (Fengshi Inc., Suzhou, JS, China) for a 24-hour urinary collection in a 4-week interval to measure urine volume. Urinary levels of albumin was measured by a competitive ELISA method according to the manufacturer's instructions (Exocell, Philadelphia, PA, USA) and presented as the albumin to creatinine ratio (ACR). Body weight was measured every two weeks. Blood glucose was measured every 4 weeks by tail-vein blood sampling with One Touch Ultra blood glucose monitoring system (LifeScan, Milpitas, CA USA). Rats were sacrificed and aortic blood was collected without anticoagulant and centrifuged at 3000 g/min and 4°C for 15 min. Serum was separated and creatinine was measured using a CD-1600C Schematology analyzer (Abbott Labs, USA).

Experimental procedures were approved by the Ethics Committee of China-Japan Friendship Hospital, Institute of Clinical Medical science (No. 2012-A04) and performed in accordance with the The National Academies *Guiding Principles for the Care and Use of Laboratory Animals*, 8<sup>th</sup> edition.

## Histology and immunohistochemistry

Rats treated with or without TSF were sacrificed at 20 weeks after treatment. Kidney tissues were fixed in 10% phosphate buffered formalin solution, embedded in paraffin, and then sectioned into 3-μm thicknesses and stained with Masson's trichrome and periodic acid-Schiff (PAS). Glomerulosclerosis was defined as the percentage of ECM deposition and mesangial expansion and evaluated at 400× power for 20 cortical fields. Tubulointerstitial damage was assessed based on the established method and scoring system [14]. Briefly, the percentage of tubulointerstitial damage including tubular atrophy and dilation, formation of casts, as well as

interstitial mononuclear cell and extracellular matrix accumulation (interstitial volume) was scored in 10-cortical fields (200 $\times$ ). The scoring system was as follows: 1 = less than 10%; 2 = 10–25%; 3 = 26–50%, 4 = 51–75%, 5 = 76–95%, 6 = more than 95%.

A microwave-based antigen retrieval method was applied to conduct immunohistochemistry on the paraffin sections [21]. Antibodies used included: primary antibodies against fibronectin, phosphorylated Smad2/3 (p-Smad2/3), TNF $\alpha$ , IL-1 $\beta$ , and TGF- $\beta$ 1 (all purchased from Santa Cruz Biotechnology, Dallas, TX, USA), collagens I and IV (SouthernBiotech, Birmingham, AL, USA), MCP-1 (eBioscience, San Diego, CA, USA), phosphorylated-NF- $\kappa$ B/p65 (p-p65; Cell Signaling Technology, Danvers, MA, USA) and ED-1 (AbDSerotec, Kidlington, UK). After being immuno stained, sections were developed with diaminobenzidine to produce a brown product. The sections were then counterstained with hematoxylin. Deposition of collagen I and fibronectin was measured using the quantitative Image Analysis System (Image-Pro Plus v 6.0, Media Cybernetics, Warrendale, PA, USA). Briefly, in both glomeruli and tubulointerstitium, 10 random fields were outlined and positive staining patterns were identified under 200 $\times$  power. Then, the percentage of positive area in the examined field was measured. Accumulation of collagen IV in 20 random glomeruli under 400  $\times$  power was analyzed as above. The arterial lumen space was excluded from the study. Numbers of p-Smad2/3<sup>+</sup>, p-p65<sup>+</sup> cells were counted in 20 random glomeruli and expressed as cells/glomerular cross-section, whereas positive cells in the tubulointerstitium were counted in 20 random fields for each sample under high-power fields (400 $\times$ ) by means of a 0.0625-mm<sup>2</sup>graticule fitted in the eyepiece of the microscope, and expressed as cells per mm<sup>2</sup> [14]. ED-1<sup>+</sup> macrophages were randomly counted in twenty fields of cortex per section under high-power fields (400 $\times$ ), and expressed as cells per mm<sup>2</sup> [12]. All counting was performed on blinded slides. Data were expressed as the means  $\pm$  SE.

### Extraction of RNA and RT-PCR analysis

Renal cortical tissues were collected by carefully removing the renal pelvis and medullar tissues and were frozen at -80 $^{\circ}$ C for extraction of total RNA by Trizol reagent (Invitrogen, Life Technologies, Carlsbad, CA, USA). Template cDNA was prepared by using reverse transcriptase (Thermo Scientific, Lithuania). The genes of interest were analyzed by real-time PCR following the manufacturer's instructions (ABI system, USA).

Primers used for detection of rat mRNAs were: collagen IV: forward 5'-GGCGGTGCACAGT CAGACCAT-3' and reverse 5'-GGAATAGCCAATCCA CAGTGA-3'; collagen I: forward 5'-CACAAGCGTGCTGTAGGTGA-3' and reverse 5'-TGCCGTGACCTCAAGATGTG-3'; fibronectin: forward 5'-GAGGAGGTCCAAATCGGTTCATGTT-3' and reverse 5'-AACTGTAAGGGCTCTTCGT CAATG-3'; TGF- $\beta$ 1: forward 5'-ACGTCAGACATTCGGGAAGCAGTG-3' and reverse 5'-GCAAGGACCTTGCTGTACTGTGTG-3'; Smad3: forward 5'-CTCCTACTACGAGCTGAACCAG-3' and reverse 5'-CTCATGCGGATGGTGCACATTC-3'; MCP-1 forward 5'-CACTGGCAAGATG ATCCCAATG-3' and reverse 5'-CTTCTA CAGAAGTGCTTGAGGTGG-3'; TNF $\alpha$  forward 5'-GCACAGAAAGCATGATCCGAGTG-3' and reverse 5'-TTGGGAACCTCTCCTCC TTGTTGG-3'; IL-1 $\beta$  forward 5'-TCACTCATTGTGGCTGTGGAGAAG-3' and reverse 5'-CACACACTAGCAGGTCGTCATCAT-3';  $\beta$ -actin: forward 5'-GAGACCTTCAACACCCAGCC-3' and reverse 5'-GCGGGGCATCGGAACCGCTCA-3'. The ratio of mRNA expression was examined to house-keeping gene  $\beta$ -actin and expressed as the means  $\pm$  SE.

### Western blot analysis

Proteins for Western blot analysis were extracted from the renal cortex by lysing with radioimmunoprecipitation assay (RIPA) buffer as described previously [22]. Antibodies used in this study included primary antibodies against fibronectin, TGF- $\beta$ 1, TGF- $\beta$  receptor I (T $\beta$ RI),

phospho-TβRI (p-TβRI), TGF-β receptor II (TβRII), Smad ubiquitination regulatory factor 2 (Smurf2) and Smad7 (Santa Cruz Biotechnology, Santa Cruz, CA, USA), Smad3 (Zymed Laboratories, South San Francisco, CA, USA), p-p65, phospho-Smad3 (p-Smad3) and IκB-α (Cell Signaling Technology Inc., Danvers, MA, USA), collagen I and IV (Southern Biotech, Birmingham, AL, USA), and IRDye™800 conjugated secondary antibodies (Rockland Immunochemicals Inc., Gilbertsville, PA, USA). Signals were detected with Odyssey Infrared Imaging System (LI-COR Biosciences, Lincoln, NE, USA) and quantified with Image J program (National Institutes of Health, Bethesda, MD, USA). Ratio for the protein examined was normalized against β-actin and expressed as means ± SE.

### Statistical analysis

Data collected from this study were expressed as means ± SE and analyzed using ANOVA, followed by post comparison using the Newman Keuls program from GraphPad Prism 5.0 (GraphPad Software, San Diego, CA, USA).

## Results

### TSF treatment attenuates proteinuria and histological damage in the diabetic kidney with type 2 diabetes in rats

After a low dose STZ injection, rats fed with the high-fat diet developed hyperglycemia at the first week (termed week 0) and maintained at high levels of blood glucose over the 20-week study period (Fig 1A). Microalbuminuria in diabetic rats increased markedly at the 4th week and

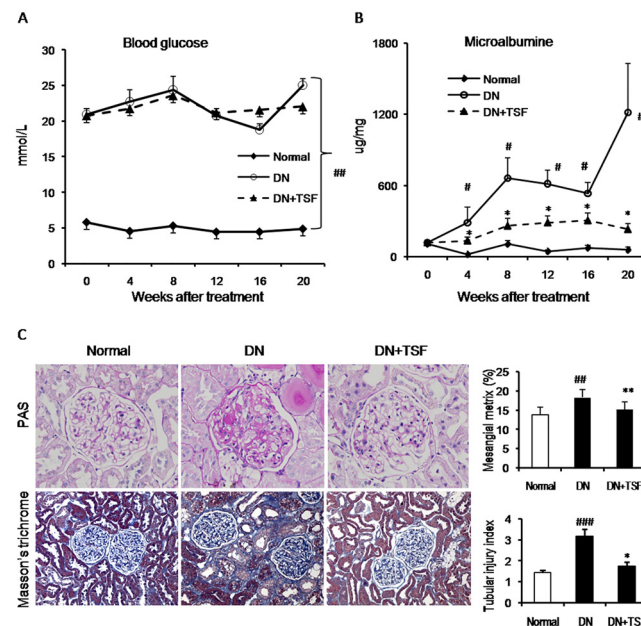

**Fig 1. TSF attenuates renal injury in DN rats.** (A) Blood glucose. Blood glucose levels in DN rats are significantly increased after STZ-injection and high-fat-diet induction and maintained at equal higher levels during the 20 weeks. TSF-treated rats exhibit no effect on blood glucose level. (B) Microalbuminuria. DN rats without TSF treatment show more severe microalbuminuria than those with TSF treatment over 4–20 weeks. (C) Histology (PAS staining, original magnification, × 400; Masson’s trichrome staining, original magnification, × 200) and semi-quantification of mesangial matrix and tubular injury. Data are expressed as means ± SE for each group of 9 rats. \**P* < 0.05, \*\**P* < 0.01 TSF-treated group vs. DN group; #*P* < 0.05, ##*P* < 0.01, ###*P* < 0.001 DN group vs. normal group.

doi:10.1371/journal.pone.0147693.g001

peaked at week 20, which was significantly reduced in the diabetic rats treated with TSF (Fig 1B). Compared to the age-matched normal rats, diabetic rats also developed a significant weight loss from weeks 4 to 20 (S1A Fig). Meanwhile, a significant increase in urine volume in diabetic rats was observed from the 8th week after STZ injection (S1B Fig). Interestingly, compared to normal rats, levels of serum creatinine in diabetic rats were lower, which was not altered by TSF treatment (S1C Fig). No effects on blood glucose level, body weight and urine volume were observed (Fig 1A and S1B and S1C Fig).

Histologically, kidneys from diabetic rats showed a moderate mesangial matrix expansion, thickening of the glomerular basement membrane, tubular atrophy, and extracellular matrix deposition (Fig 1C). Treatment with TSF for 20 weeks significantly inhibited these histological injuries (Fig 1C).

### TSF treatment inhibits renal inflammation and fibrosis in the diabetic kidney with type 2 diabetes in rats

We then examined the therapeutic effect of TSF on renal inflammation and fibrosis in diabetic rats. Immunohistochemistry and real time PCR revealed that rats with type 2 diabetes developed moderate renal inflammation, including many ED1<sup>+</sup> macrophage infiltration and a significant upregulation of proinflammatory cytokines (IL-1 $\beta$ , TNF $\alpha$ ) and macrophage chemotactic molecule-1 (MCP-1) at both mRNA and protein levels, which was attenuated by treatment with TSF (Fig 2). Similarly, a moderate renal fibrosis such as upregulation and accumulation of collagen I, collagen IV, and fibronectin in the diabetic kidney was largely reduced after treatment with TSF (Fig 3).

### Inhibition of TGF- $\beta$ /Smad3 and NF- $\kappa$ B signaling pathways may be mechanisms by which TSF attenuates diabetic renal fibrosis and inflammation

It has been well documented that TGF- $\beta$ /Smad signaling is a major pathway leading to renal fibrosis and the activation of NF- $\kappa$ B signaling plays a critical role in renal inflammation [23, 24]. We thus investigated the potential mechanisms by which TSF treatment attenuates diabetic renal fibrosis and inflammation by examining the TGF- $\beta$ /Smad3 and NF- $\kappa$ B signaling pathways. Immunohistochemistry and western blot analysis showed that treatment with TSF blocked the activation of NF- $\kappa$ B signaling in the diabetic kidney by largely inhibiting I $\kappa$ B $\alpha$  degradation and phosphorylated NF- $\kappa$ B/p65 nucleated translocation (Fig 4). Further study also showed that treatment with TSF resulted in a marked suppression of the activation of TGF- $\beta$ /Smad3 signaling by inhibiting expression of TGF- $\beta$ 1 and its receptor I (T $\beta$ RI, p-T $\beta$ RI), phosphorylation of Smad3 protein and its nuclear translocation in the diabetic kidney (Figs 5 and 6). Thus, results from this study revealed that treatment with TSF significantly suppressed diabetic kidney injury via mechanisms associated with NF- $\kappa$ B-driven renal inflammation and TGF- $\beta$ /Smad3-mediated renal fibrosis.

### Enhanced renal Smad7 is an underlying mechanism required for the treatment of TSF on down-regulating of TGF- $\beta$ /Smad-mediated renal fibrosis and NF- $\kappa$ B-driven inflammation in type 2 diabetes in rats

We have previously shown that Smad7 is an integrated regulator that negatively regulates TGF- $\beta$ /Smad-mediated renal fibrosis via its negative feedback-loop and NF- $\kappa$ B-dependent renal inflammation by inducing I $\kappa$ B $\alpha$ , an inhibitor of NF- $\kappa$ B [12, 23]. However, Smad7 is degraded via a Smurf2-dependent proteasomal ubiquitin degradation mechanism [11].

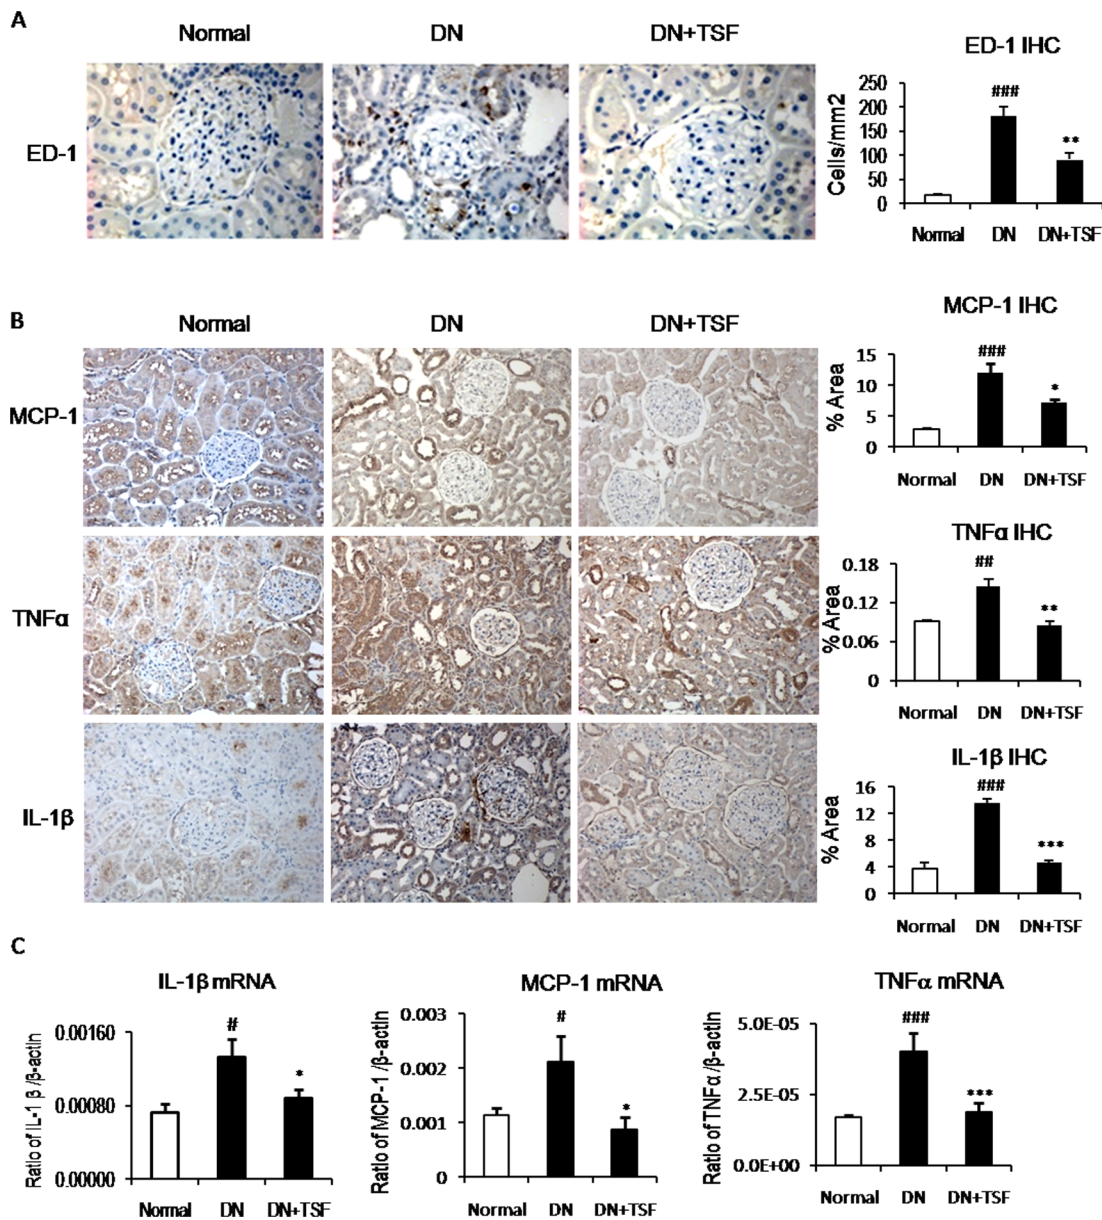

**Fig 2. TFS inhibits renal inflammation in DN rats.** (A) Infiltration of monocytes/macrophages. ED-1-positive cells were detected by immunohistochemistry and calculated per high-power field (400 ×). (B) Immunohistochemistry and semi-quantitative analysis for MCP-1, TNFα, and IL-1β. (C) Real-time PCR for IL-1β, MCP-1, and TNFα. Original magnification, × 200. TFS-treated rats exhibit a significant inhibition of renal inflammation including ED-1, MCP-1, IL-1β, and TNFα. Data are expressed as means ± SE for each group of 9 rats. \**P*<0.05, \*\**P*<0.01 TFS-treated group vs. DN group; #*P*<0.05, ##*P*<0.01, ###*P*<0.001 DN group vs. normal group.

doi:10.1371/journal.pone.0147693.g002

Therefore, we examined whether TFS treatment alters the expression of Smurf2 and/or Smad7 in the diabetic kidney. Western blot analysis detected that Smurf2 expression was significantly increased in the diabetic kidney, which was associated with the reduction of Smad7 protein (Fig 7). In contrast, treatment with TFS reversed these changes by inhibiting Smurf2 and therefore protecting Smad7 from degradation (Fig 7).

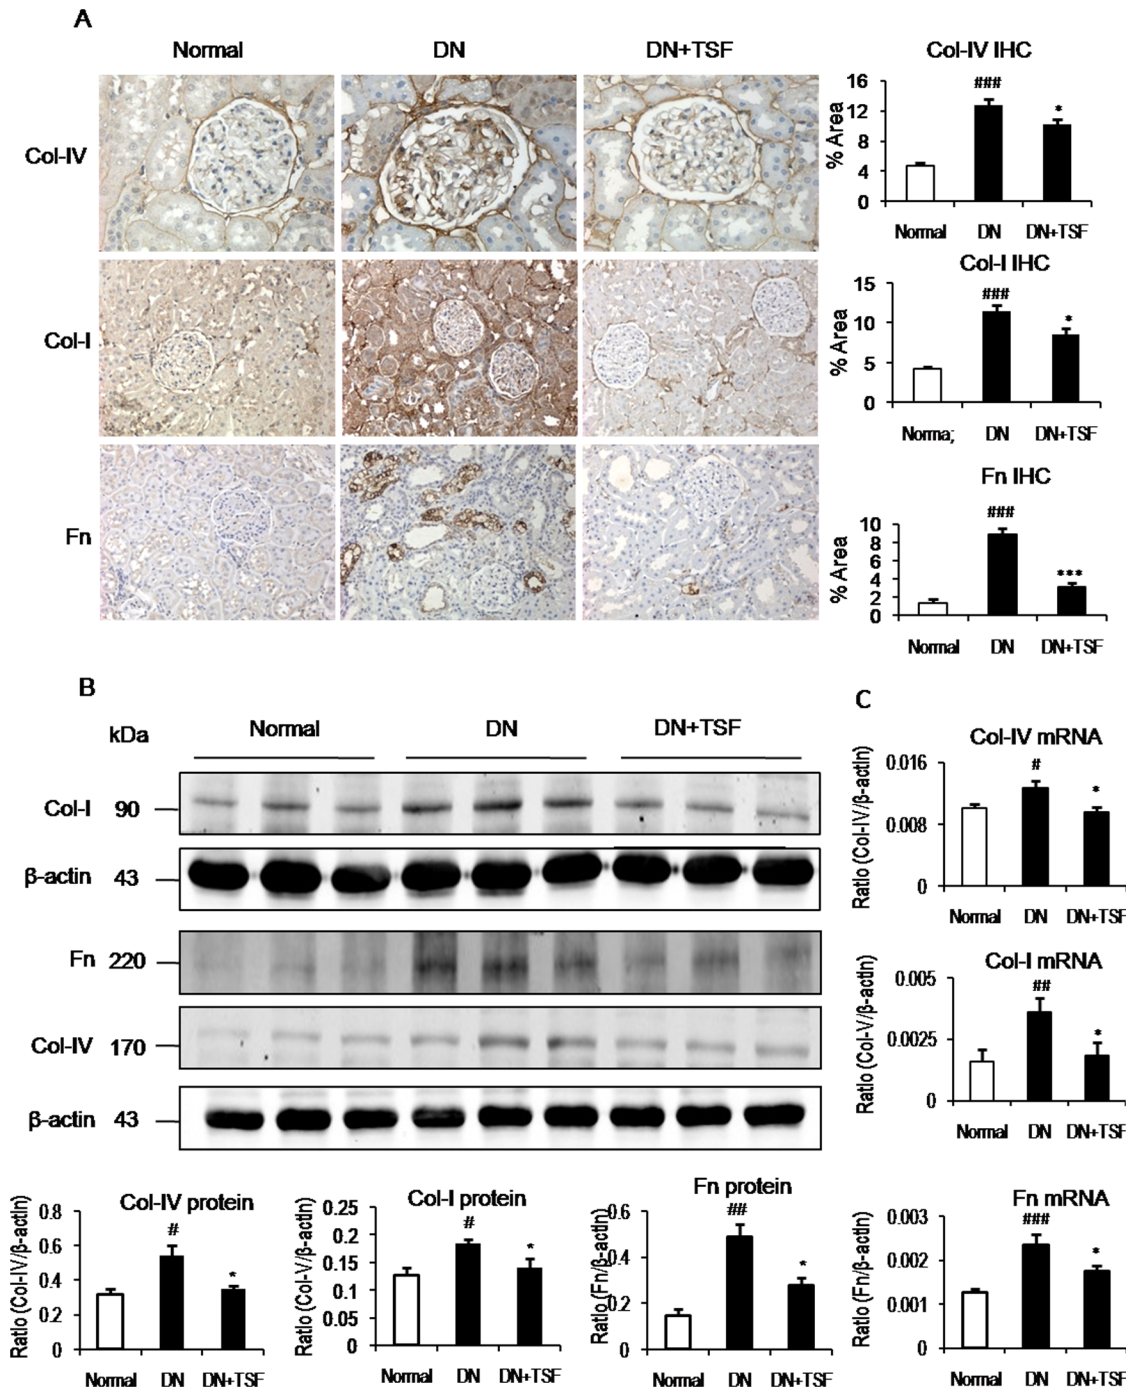

**Fig 3. TSF inhibits renal fibrosis in DN rats.** (A) Immunohistochemistry (IHC) and quantitative analysis of collagen IV (Col-IV, original magnification, × 400), collagen I (Col-I, original magnification, × 200), and fibronectin (Fn, original magnification, × 200). (B) Western blot and quantitative analysis of collagen I, collagen IV, and fibronectin. (C) Real-time PCR of collagen I, collagen IV, and fibronectin. Results show that compared with the normal rats, renal fibrosis markedly enhanced in DN rats. However, in TSF-treated DN rats renal fibrosis is inhibited as demonstrated by Western blot analysis, IHC at the protein level and real-time PCR at the mRNA level. Data are expressed as means ± SE for each group of 9 rats. \**P*<0.05, \*\**P*<0.01 TSF-treated group vs. DN group; #*P*<0.05, ##*P*<0.01, ###*P*<0.001 DN group vs normal group.

doi:10.1371/journal.pone.0147693.g003



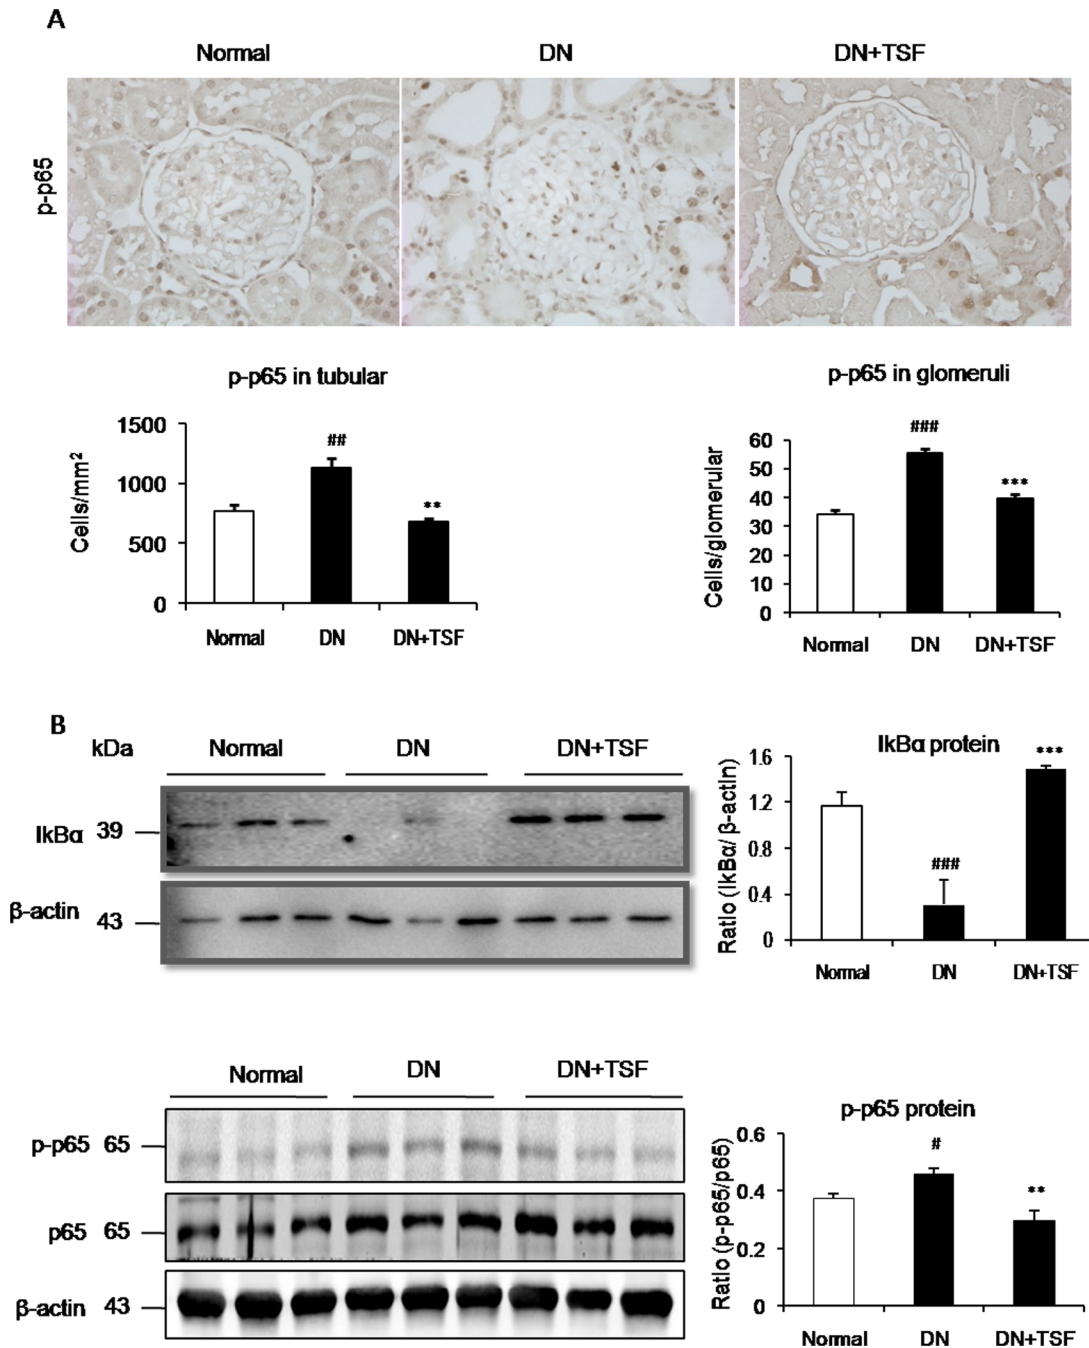

**Fig 4. TSF blocks activation of the NF-κB signaling pathway in DN rats.** (A) Immunohistochemistry and semi-quantitative analysis of phosphorylated NF-κB/p65 nuclear location in the glomeruli and tubulointerstitium. Original magnification, × 400. (B) Western blot and semi-quantitative analysis of renal phosphorylation of IκBα and NF-κB/p65 (p-p65). Data are expressed as means ± SE for each group of 9 rats. \**P*<0.05, \*\**P*<0.01, \*\*\**P*<0.001 DN group vs. DN group; #*P*<0.05, ##*P*<0.01, ###*P*<0.001 DN group vs normal group.

doi:10.1371/journal.pone.0147693.g004

## Discussion

The present study provided evidence that the Chinese herbal medicine Tangshen Formula (TSF) significantly inhibited albuminuria and largely alleviated diabetic kidney disease in a rat model of type 2 diabetes induced by high-fat diet and STZ injection. The therapeutic effect of

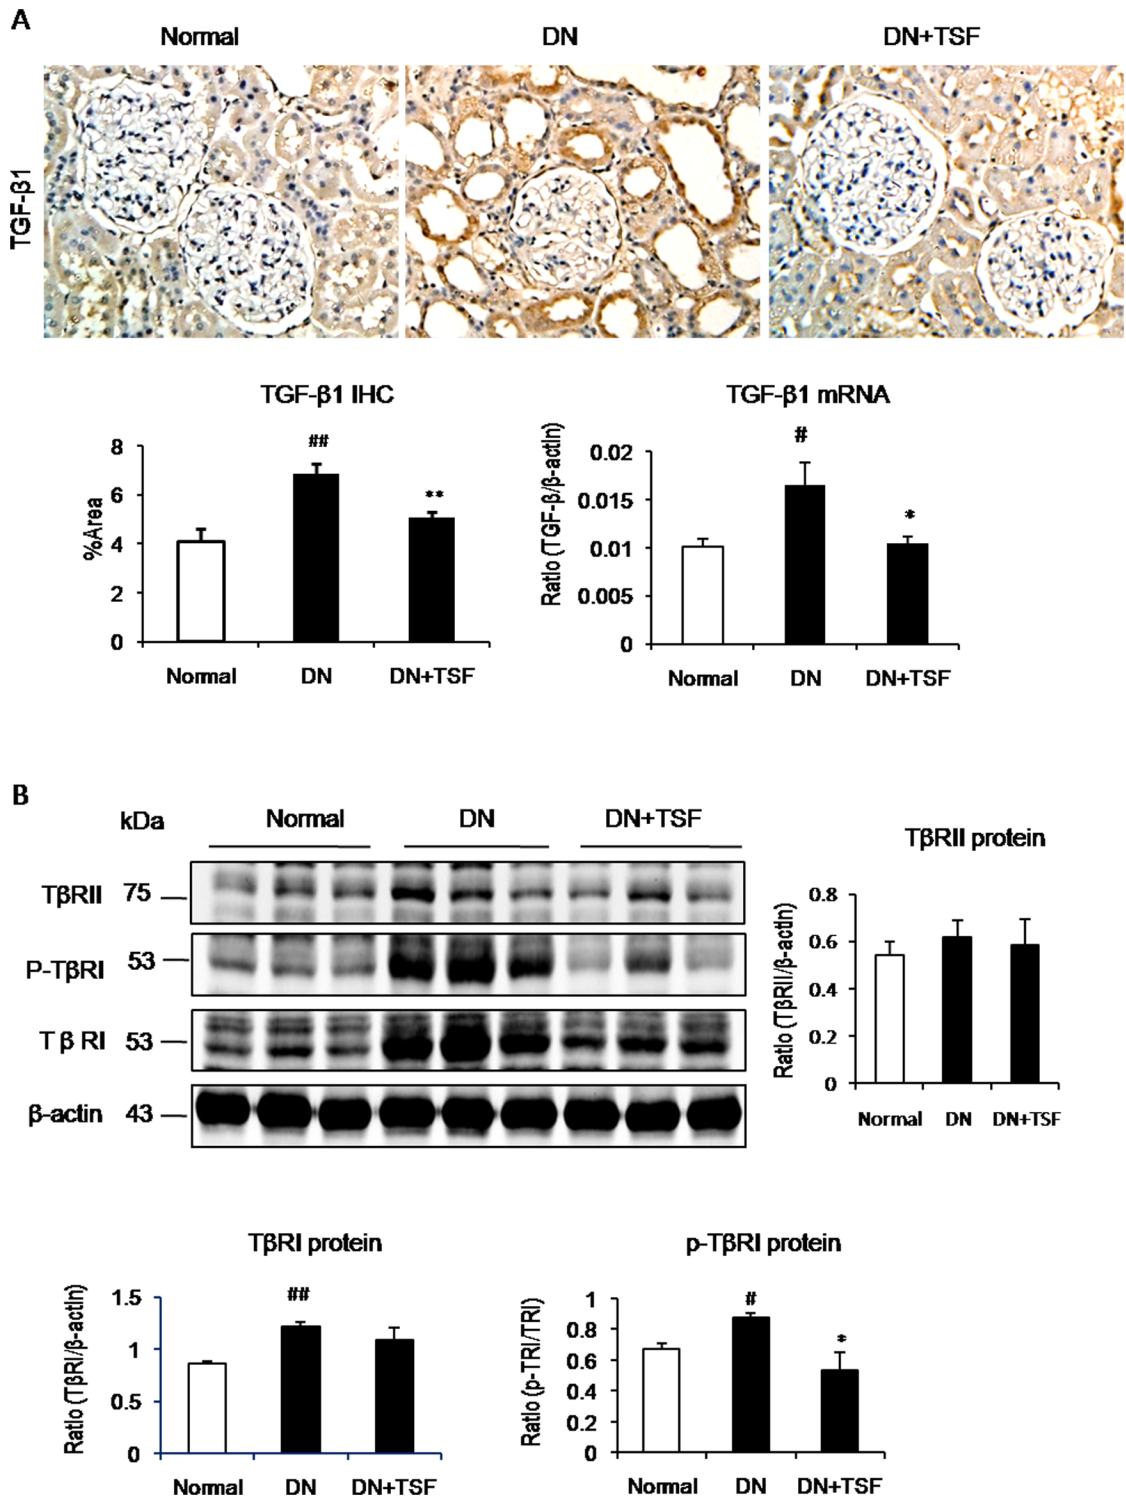

**Fig 5. TSF treatment inhibits expression of the TGF-β1 and TGF-β receptors in DN rats.** (A) Immunohistochemistry. Original magnification, × 200 and real-time PCR for TGF-β1. (B) Western blot and semi-quantitative analysis of renal TGF-β receptor II (TβRII), phosphorylation of TGF-β receptor I (p-TβRI) and TβRI, respectively. A marked activation of TGF-β/TGF-β receptor signaling in the diabetic kidney is blocked by TSF treatment. Data are expressed as means ± SE for each group of 9 rats. \**P*<0.05, \*\**P*<0.01 TSF-treated group vs. DN group; #*P*<0.05, ##*P*<0.01, ###*P*<0.001 DN group vs. normal group.

doi:10.1371/journal.pone.0147693.g005

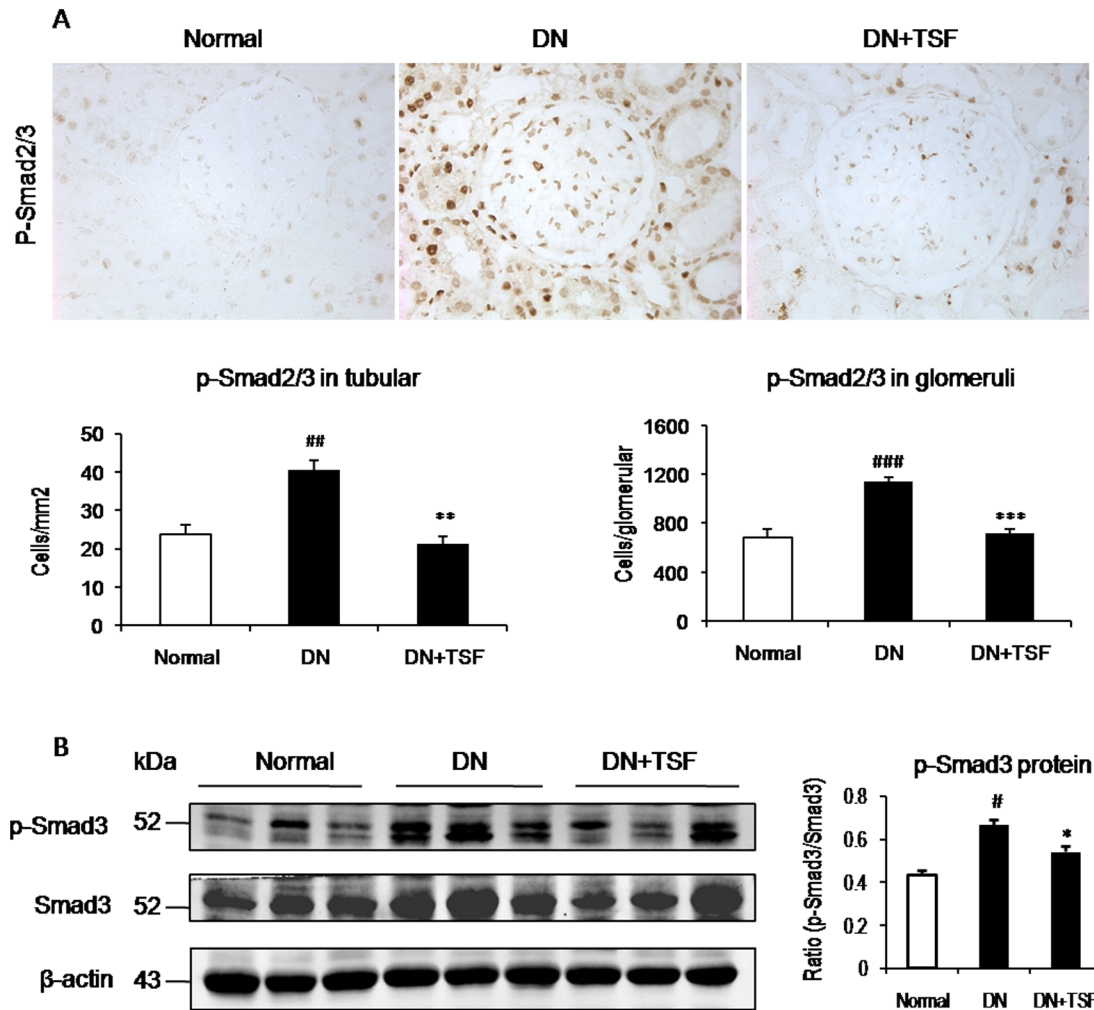

**Fig 6. TSF blocks activation of Smad2/3 in DN rats.** (A) Immunohistochemistry and semi-quantitative analysis of phosphorylated Smad2/3 nuclear location in the glomeruli and tubulointerstitium. Original magnification,  $\times 400$ . (B) Western blot and semi-quantitative analysis of renal phosphorylation of Smad3 (p-Smad3) and Smad3. Data are expressed as means  $\pm$  SE for each group of 9 rats.  $*P < 0.05$ ,  $**P < 0.01$  TSF-treated group vs. DN group;  $^{\#}P < 0.05$ ,  $^{##}P < 0.01$ ,  $^{###}P < 0.001$  DN group vs normal group.

doi:10.1371/journal.pone.0147693.g006

TSF on diabetic kidney injury was associated with the inhibition of NF- $\kappa$ B-driven inflammation and TGF- $\beta$ /Smad3-mediated renal fibrosis.

In this study, we successfully replicated the diabetic nephropathy in a type-2 diabetic rat model induced by high-fat diet-fed and low dose of streptozotocin. In comparison to normal rats, blood glucose levels and proteinuria in DN rats were increased significantly throughout the experiment, accompanied by the typical syndrome of diabetes such as polyphagia, polydipsia, polyuria and emaciation. Glomerular hypertrophy, mesangial matrix accumulation, and tubular atrophy were developed in DN rats and were inhibited after 20-week treatment with TSF. Interestingly, compared to the normal rats, the development of lower levels of serum creatinine in diabetic rats with or without TSF treatment may be attributed to the glomerular hyperfiltration occurred in the early stage of DN.

Renal fibrosis is a hallmark of chronic kidney disease including diabetic nephropathy and is mediated by TGF- $\beta$ /Smad3 signaling [12, 25, 26]. A significant finding from the present study was that TSF protected kidneys from diabetic injuries by down-regulating expression of TGF-

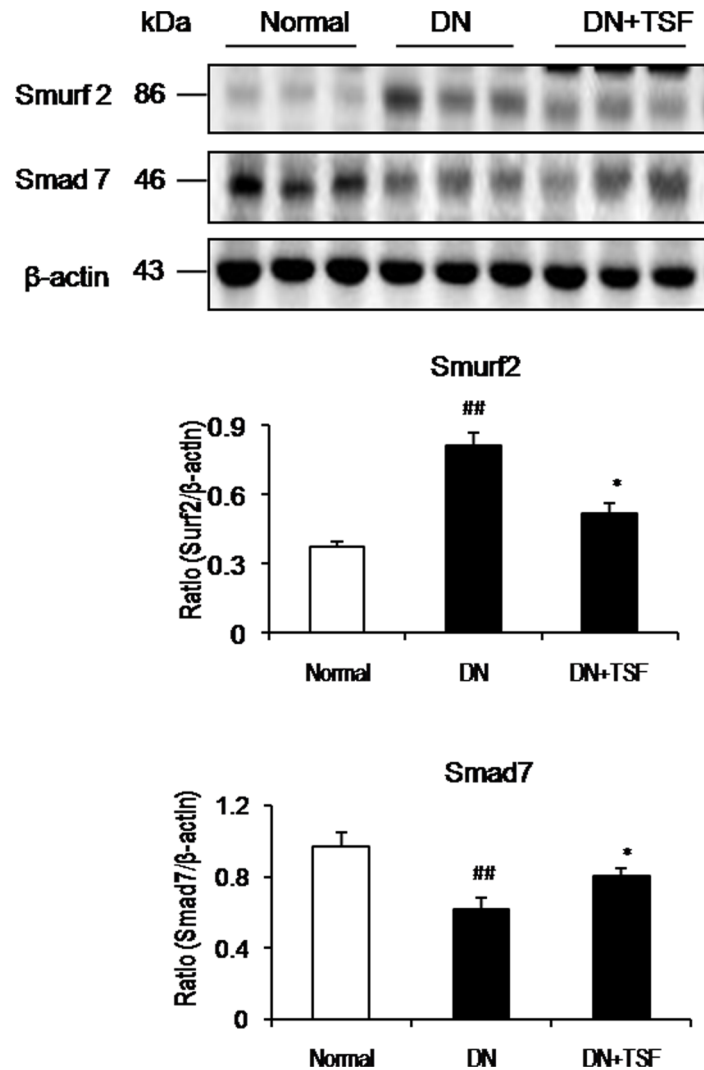

**Fig 7. TSF regulates expression of renal Smurf2 and Smad7 in DN rats.** Western blot and semi-quantitative analysis of renal Smurf2 and Smad7 show that TSF treatment largely reduces renal Smurf2 expression in diabetic rats, resulting in less degradation of Smad7 protein. Data are expressed as means  $\pm$  SE for each group of 9 rats. \* $P$ <0.05, \*\* $P$ < 0.01 TSF-treated group vs. DN group; # $P$ <0.05, ## $P$ <0.01, ### $P$ <0.001 DN group vs. normal group.

doi:10.1371/journal.pone.0147693.g007

$\beta$ 1 and TGF- $\beta$  receptor I, thereby inactivating Smad3 signaling and blocking renal fibrosis including expression and accumulation of collagen I, IV, and fibronectin in the diabetic kidney. These findings were consistent with previous reports that mice lacking Smad3 are protected against renal fibrosis in a number of experimental models of chronic kidney diseases including hypertensive nephropathy and obstructive nephropathy [26–28]. Thus, it is possible that the renal protective effect of TSF on diabetes may be associated with the inhibition of TGF- $\beta$ /Smad3-mediated renal fibrosis.

Inhibition of NF- $\kappa$ B-driven renal inflammation may be another mechanism associated with the renoprotective effect of TSF on DN. It is now recognized that NF- $\kappa$ B is a central signaling pathway in inflammation. Many inflammatory mediators such as IL-1 $\beta$ , TNF $\alpha$ , MCP-1, can activate the NF- $\kappa$ B signaling pathway to mediate renal inflammation, resulting in progressive DN [27]. In the present study, treatment with TSF was capable of preventing I $\kappa$ B $\alpha$  (an

inhibitor of NF- $\kappa$ B) from degradation, thereby inhibiting the activation of NF- $\kappa$ B signaling and NF- $\kappa$ B-driven renal inflammation in DN induced by high-fat diet and STZ injection. These findings suggest that TSF may negatively regulate NF- $\kappa$ B signaling to control renal inflammation in DN.

More significantly, we also found that inhibition of Smurf2-mediated ubiquitin degradation of Smad7 may be a central mechanism by which TSF suppressed both TGF- $\beta$ /Smad3-mediated renal fibrosis and NF- $\kappa$ B-dependent renal inflammation in the diabetic kidney. In general, ubiquitination is a process that regulates ubiquitin molecules to attach to specific target proteins through the activation of three specific enzymes, including ubiquitin-activation enzyme (E1), ubiquitin-conjugation enzyme (E2), and ubiquitin ligase enzyme (E3) [28]. These polyubiquitinated target proteins are then disrupted and degraded by the 26S proteasome complex. Smurf2 has been reported to be an important E3 ligase that participates in modulating TGF- $\beta$ -mediated signaling by targeting TGF- $\beta$  receptor-1 and Smad2 (14, 15, and 32). Smad7 acts as an adaptor protein to help Smurf2 conjugating to TGF- $\beta$  receptor-1 to cause its degradation, resulting in down-regulation of TGF- $\beta$  signaling [11]. At the same time, ubiquitin-degradation of Smad7 occurs simultaneously [29]. If Smad7 is extensively degraded, Smad3 becomes overactivated and renal fibrosis is enhanced [30]. In addition, Smad7 is also a negative regulator of NF- $\kappa$ B signaling in both obstructive and diabetic nephropathy [31]. Smad7 can induce I $\kappa$ B $\alpha$  expression and prevents I $\kappa$ B $\alpha$  from degradation, thereby inactivating NF- $\kappa$ B signaling and suppressing NF- $\kappa$ B-dependent renal inflammation *in vivo* and *in vitro* [32, 33]. In this study, we clearly demonstrated that treatment with TSF resulted in a marked inhibition of Smurf2 and therefore blocked the Smurf2-mediated Smad7 ubiquitin degradation pathway. As the consequence of intact Smad7, activation of both TGF- $\beta$ /Smad3 signaling and NF- $\kappa$ B signaling in the diabetic kidney was inhibited, thereby resulting in attenuation of renal fibrosis and inflammation. Thus, protection of Smad7 from degradation may be a key mechanism by which TSF inhibited diabetic kidney disease.

## Conclusions

In conclusion, the present study demonstrates that orally administered TSF significantly inhibits diabetic kidney disease. We also identify that prevention of Smurf2-mediated Smad7 ubiquitin degradation, thereby inhibiting both TGF- $\beta$ /Smad3-mediated renal fibrosis and NF- $\kappa$ B-dependent renal inflammation may be mechanisms associated with the beneficial effect of TSF on DN.

## Supporting Information

**S1 Fig. Effect of TSF treatment on body weight (A), urine volume (B), and serum creatinine (C) in DN rats induced by high-fat-diet and STZ-injection.** Data are expressed as means  $\pm$  SE for each group of 9 rats. \* $P$ <0.05, \*\* $P$ <0.01 TSF-treated group vs. DN group; # $P$ <0.05, ## $P$ <0.01, ### $P$ <0.001 DN group vs. normal group. (TIF)

## Acknowledgments

The authors thank Nissi S. Wang, for developmental review and editing of the manuscript.

## Author Contributions

Conceived and designed the experiments: PL HYL TTZ. Performed the experiments: TTZ SFS HJZ MHY XD YMW HW. Analyzed the data: TTZ SFS. Contributed reagents/materials/analysis tools: XRH. Wrote the paper: TTZ HYL.

## References

1. Schena FP, Gesualdo L. Pathogenetic mechanisms of diabetic nephropathy. *J Am Soc Nephrol*. 2005; 16 Suppl 1:S30–33. PMID: [15938030](#)
2. Mason RM, Wahab NA. Extracellular matrix metabolism in diabetic nephropathy. *J Am Soc Nephrol*. 2003; 14:1358–1373. PMID: [12707406](#)
3. Duran-Salgado MB, Rubio-Guerra AF. Diabetic nephropathy and inflammation. *World J Diabetes*. 2014; 5:393–398. doi: [10.4239/wjd.v5.i3.393](#) PMID: [24936261](#)
4. Lim AK, Tesch GH. Inflammation in diabetic nephropathy. *Mediators Inflamm*. 2012; 2012:146154. doi: [10.1155/2012/146154](#) PMID: [22969168](#)
5. Nguyen D, Ping F, Mu W, Hill P, Atkins RC, Chadban SJ. Macrophage accumulation in human progressive diabetic nephropathy. *Nephrology (Carlton)*. 2006; 11:226–231.
6. Lan HY. Diverse roles of TGF- $\beta$ /Smads in renal fibrosis and inflammation. *International journal of biological sciences*. 2011; 7:1056. PMID: [21927575](#)
7. Sato M, Muragaki Y, Saika S, Roberts AB, Ooshima A. Targeted disruption of TGF- $\beta$ 1/Smad3 signaling protects against renal tubulointerstitial fibrosis induced by unilateral ureteral obstruction. *Journal of Clinical Investigation*. 2003; 112:1486. PMID: [14617750](#)
8. Derynck R, Zhang YE. Smad-dependent and Smad-independent pathways in TGF-beta family signaling. *Nature*. 2003; 425:577–584. PMID: [14534577](#)
9. Lan HY, Chung AC. Transforming growth factor-beta and Smads. *Contrib Nephrol*. 2011; 170:75–82. doi: [10.1159/000324949](#) PMID: [21659760](#)
10. El Mesallamy HO, Ahmed HH, Bassyouni AA, Ahmed AS. Clinical significance of inflammatory and fibrogenic cytokines in diabetic nephropathy. *Clinical biochemistry*. 2012; 45:646–650. doi: [10.1016/j.clinbiochem.2012.02.021](#) PMID: [22421318](#)
11. Kavsak P, Rasmussen RK, Causing CG, Bonni S, Zhu H, Thomsen GH, et al. Smad7 binds to Smurf2 to form an E3 ubiquitin ligase that targets the TGF beta receptor for degradation. *Mol Cell* 2000; 6:1365–1375. PMID: [11163210](#)
12. Chen HY, Huang XR, Wang W, Li JH, Heuchel RL, Chung AC, et al. The protective role of Smad7 in diabetic kidney disease: mechanism and therapeutic potential. *Diabetes*. 2011; 60:590–601. doi: [10.2337/db10-0403](#) PMID: [20980457](#)
13. Chung AC, Huang XR, Zhou L, Heuchel R, Lai KN, Lan HY. Disruption of the Smad7 gene promotes renal fibrosis and inflammation in unilateral ureteral obstruction (UUO) in mice. *Nephrol Dial Transplant*. 2009; 24:1443–1454. doi: [10.1093/ndt/gfn699](#) PMID: [19096081](#)
14. Zhao TT, Zhang HJ, Lu XG, Huang XR, Zhang WK, Wang H, et al. Chaihuang-Yishen granule inhibits diabetic kidney disease in rats through blocking TGF-beta/Smad3 signaling. *PLoS One*. 2014; 9:e90807. doi: [10.1371/journal.pone.0090807](#) PMID: [24646636](#)
15. Wen X, Zeng Y, Liu L, Zhang H, Xu W, Li N, et al. Zhenqing recipe alleviates diabetic nephropathy in experimental type 2 diabetic rats through suppression of SREBP-1c. *J Ethnopharmacol*. 2012; 142:144–150. doi: [10.1016/j.jep.2012.04.028](#) PMID: [22564814](#)
16. Zhang H, Li P, Burczynski FJ, Gong Y, Choy P, Sha H, Li J: Attenuation of Diabetic Nephropathy in Otsuka Long-Evans Tokushima Fatty (OLETF) Rats with a Combination of Chinese Herbs (Tangshen Formula). *Evid Based Complement Alternat Med*. 2011; 2011:613737. doi: [10.1155/2011/613737](#) PMID: [21274280](#)
17. Li P, Chen Y, Liu J, Hong J, Deng Y, Yang F, et al. Efficacy and safety of tangshen formula on patients with type 2 diabetic kidney disease: a multicenter double-blinded randomized placebo-controlled trial. *PLoS One*. 2015; 10:e0126027. doi: [10.1371/journal.pone.0126027](#) PMID: [25938778](#)
18. Committee NP. In: *Pharmacopoeia of The People's Republic of China*. Beijing: China Medical Pharmaceutical Science & Technology Publishing House; 2010.
19. Zhu B, Gong Y, Chen P, Zhang H, Zhao T, Li P. Increased DNase I activity in diabetes might be associated with injury of pancreas. *Mol Cell Biochem*. 2014; 393:23–32. doi: [10.1007/s11010-014-2043-1](#) PMID: [24676545](#)
20. Butler AE, Janson J, Soeller WC, Butler PC; Increased beta-cell apoptosis prevents adaptive increase in beta-cell mass in mouse model of type 2 diabetes: evidence for role of islet amyloid formation rather than direct action of amyloid. *Diabetes*. 2003; 52:2304–2314. PMID: [12941770](#)
21. Lan HY, Mu W, Nikolic-Paterson DJ, Atkins RC. A novel, simple, reliable, and sensitive method for multiple immunoenzyme staining: use of microwave oven heating to block antibody crossreactivity and retrieve antigens. *J Histochem Cytochem*. 1995; 43:97–102. PMID: [7822770](#)

22. Meng XM, Huang XR, Xiao J, Chen HY, Zhong X, Chung AC, et al. Diverse roles of TGF-beta receptor II in renal fibrosis and inflammation in vivo and in vitro. *J Pathol.* 2012; 227:175–188. doi: [10.1002/path.3976](https://doi.org/10.1002/path.3976) PMID: [22190171](https://pubmed.ncbi.nlm.nih.gov/22190171/)
23. Liu GX, Li YQ, Huang XR, Wei L, Chen HY, Shi YJ, et al. Disruption of Smad7 promotes ANG II-mediated renal inflammation and fibrosis via Sp1-TGF-beta/Smad3-NF.kappaB-dependent mechanisms in mice. *PLoS One.* 2013; 8:e53573. doi: [10.1371/journal.pone.0053573](https://doi.org/10.1371/journal.pone.0053573) PMID: [23301086](https://pubmed.ncbi.nlm.nih.gov/23301086/)
24. Huang W, Xu L, Zhou X, Gao C, Yang M, Chen G, et al. High glucose induces activation of NF-kappaB inflammatory signaling through IkappaBalpha sumoylation in rat mesangial cells. *Biochem Biophys Res Commun.* 2013; 438:568–574. doi: [10.1016/j.bbrc.2013.07.065](https://doi.org/10.1016/j.bbrc.2013.07.065) PMID: [23911785](https://pubmed.ncbi.nlm.nih.gov/23911785/)
25. Hong SW, Isono M, Chen S, Iglesias-De La Cruz MC, Han DC, Ziyadeh FN: Increased glomerular and tubular expression of transforming growth factor-beta1, its type II receptor, and activation of the Smad signaling pathway in the db/db mouse. *Am J Pathol.* 2001; 158:1653–1663. PMID: [11337363](https://pubmed.ncbi.nlm.nih.gov/11337363/)
26. Li JH, Huang XR, Zhu HJ, Oldfield M, Cooper M, Truong LD, et al. Advanced glycation end products activate Smad signaling via TGF-beta-dependent and independent mechanisms: implications for diabetic renal and vascular disease. *FASEB J.* 2004; 18:176–178. PMID: [12709399](https://pubmed.ncbi.nlm.nih.gov/12709399/)
27. Williams MD, Nadler JL. Inflammatory mechanisms of diabetic complications. *Curr Diab Rep.* 2007; 7:242–248. PMID: [17547842](https://pubmed.ncbi.nlm.nih.gov/17547842/)
28. Pickart CM. Mechanisms underlying ubiquitination *Annu Rev Biochem.* 2001; 70:503–533. PMID: [11395416](https://pubmed.ncbi.nlm.nih.gov/11395416/)
29. Glasgow E, Mishra L. Transforming growth factor-beta signaling and ubiquitinators in cancer. *Endocr Relat Cancer.* 2008; 15:59–72. doi: [10.1677/ERC-07-0168](https://doi.org/10.1677/ERC-07-0168) PMID: [18310276](https://pubmed.ncbi.nlm.nih.gov/18310276/)
30. Fukasawa H, Yamamoto T, Togawa A, Ohashi N, Fujigaki Y, Oda T, et al. Down-regulation of Smad7 expression by ubiquitin-dependent degradation contributes to renal fibrosis in obstructive nephropathy in mice. *Proc Natl Acad Sci U S A.* 2004; 101(23):8687–8692. PMID: [15173588](https://pubmed.ncbi.nlm.nih.gov/15173588/)
31. Liu Z, Huang XR, Chen HY, Penninger JM, Lan HY. Loss of angiotensin-converting enzyme 2 enhances TGF-b/Smad-mediated renal fibrosis and NF-kB-driven renal inflammation in a mouse model of obstructive nephropathy. *Laboratory Investigation.* 2012; 92:650–661. doi: [10.1038/labinvest.2012.2](https://doi.org/10.1038/labinvest.2012.2) PMID: [22330342](https://pubmed.ncbi.nlm.nih.gov/22330342/)
32. Ng YY, Hou CC, Wang W, Huang XR, Lan HY. Blockade of NFkappaB activation and renal inflammation by ultrasound-mediated gene transfer of Smad7 in rat remnant kidney. *Kidney Int Suppl.* 2005; S83–91.
33. Wang W, Huang XR, Li AG, Liu F, Li JH, Truong LD, et al. Signaling mechanism of TGF-beta1 in prevention of renal inflammation: role of Smad7. *J Am Soc Nephrol.* 2005; 16:1371–1383. PMID: [15788474](https://pubmed.ncbi.nlm.nih.gov/15788474/)
